# Supplementary material for: Increasing intensities of Anisakis simplex third-stage larvae (L3) in Atlantic salmon of coastal waters of Scotland
Source: Parasit Vectors. 2020 Feb 12;13:62. doi: 10.1186/s13071-020-3942-5 (PMC7017554; doi:10.1186/s13071-020-3942-5)
Supplement: Supplementary file 4 — Additional file 4: Table S4. Red Vent Syndrome prevalence rates observed in the UK between 2005–2017. [file 13071_2020_3942_MOESM4_ESM.docx]

| **Catchment** | **2004** | **2005** | **2006** | **2007** | **2008** | **2009** | **2010** | **2011** | **2012** | **2013** | **2014** | **2015** | **2016** | **2017** |
| --- | --- | --- | --- | --- | --- | --- | --- | --- | --- | --- | --- | --- | --- | --- |
| Dee | 0.4 (a) | 3.2 (a) | 9.2 (a) | 29.9 (a) | 20.9 (a) | 28.2 (a) | 23.7 (a) | 10.9 (a) | 13.2 (a) | 20.5 (a) | 25.3 (a) | 24.4 (a) | 21.7 (a) | 22.5 (a) |
| Lune | - | 0 (a) | 1.4 (a) | 23.1 (a) | 24.7 (a) | 21.2 (a) | 18.8 (a) | 16.3 (a) | 0 (a) | 41.6 (a) | 9.5 (a) | 13.6 (a) | 19 (a) | 60.2 (a) |
| Tyne | - | - | - | 1.4 (a) | 0.8 (a) | 3.4 (a) | 5.3 (a) | 3.8 (a) | 5.2 (a) | 10.1 (a) | 7.5 (a) | 10.3 (a) | 3.5 (a) | 4.9 (a) |
| Tamar | - | - | - | 60.2 (a) | 45.3 (a) | 41.5 (a) | 57.1 (a) | 45.6 (a) | 26.1 (a) | 44.5 (a) | - | 35.5 (a) | 24.6 (a) | 17.7 (a) |
| Caldew | - | - | - | 5.3 (a) | 0.3 (a) | 10.2 (a) | 5.1 (a) | 6.4 (a) | 6.1 (a) | 0.8 (a) | - | - | - | - |
| England & Wales Average | 0.4 (a) | 1.6 (a) | 5.3 (a) | 24.0 (a) | 17.7 (a) | 20.9 (a) | 22 (a) | 16.6 (a) | 10.1 (a) | 23.5 (a) | 14.1 (a) | 21.0 (a) | 17.2 (a) | 37.5 (a) |
| N. Esk | - | - | - | - | 14.4 (b) | 30.9 (c) | 26.8 (c) | - | - | - | - | - | - | - |
| Oykel | - | - | - | - | 6.6 (b) | 85.4 (c) | 50 (c) | - | - | - | - | - | - | - |
| Solway/Annan | - | - | - | - | 17.9 (b) | 17.9 (c) | - | - | - | - | - | - | - | - |
| Tweed | - | - | - | - | 12.9 (b) | 20.7 (c) | - | 30.6 (c) | - | - | - | - | - | - |
| Melvich | - | - | - | - | 17.5 (b) | 69.3 (c) | 23.2 (c) | - | - | - | - | - | - | - |
| Armadale | - | - | - | - | 14.3 (b) | 71.2 (c) | 30.7 (c) | - | - | - | - | - | - | 82 (d) |
| Scotland Average | - | - | - | - | 12.9 (b) | 43.5 (c) | - | - | - | - | - | - | - | - |

**Additional file 4: Table S4.** Red Vent Syndrome prevalence rates observed in the UK between 2005–2017.

Superscript indicates source of data: (a) International Council for the Exploration of the Sea (ICES). Preliminary assessment on salmon stocks and fisheries in England and Wales. 2017. <https://assets.publishing.service.gov.uk/government/uploads/system/uploads/attachment_data/file/808448/SalmonReport-2018-background_final.pdf>. Accessed 6 Mar 2019; (b) Pert CC, Noguera PA, Bruno DW. Scottish Red Vent Syndrome survey 2008. Internal Report No 07/09. Aberdeen: Marine Scotland Science; 2009. <https://www2.gov.scot/Uploads/Documents/Int0709c.pdf>. Accessed 6 Jan 2017; (c) Pert CC, Personal communication, 2015; (d) [46].
